# Supplementary material for: Establishment of a Novel CD34+ Hematopoietic Stem Cell-derived Xenograft Model of Hyperleukocytic Acute Myeloid Leukemia
Source: Research Square preprint supplement (doi:10.21203/rs.3.rs-783481/v2), 2021-10-05
Supplement: Supplementary file 1 [file 749db12aa89d7b3abce7c2f5.docx]

Additional file

Supplementary Figure


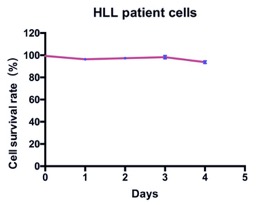


Figure S1. Detection the cell viability of the separated cells from HLL patients by MTT assay. 1×104 HLL cells per well were seeded into a 96-well plate and cultured for 24 h, 48 h, 72 h and 96 h and 120 h. Then, MTT buffer was added to each well and the plate was incubated for the appropriate time. Then, the absorbance was measured at 570 nm using a microplate reader (SpectraMax M2, Molecular Devices, China).
